# Supplementary material for: A comparative MD study of the local structure of polymer semiconductors P3HT and PBTTT
Source: Royal Society of Chemistry journal article supplement (doi:10.1039/c0cp00785d), 2010-01-01
Supplement: c0cp00785d.pdf [file c0cp00785d.pdf]

# Supplementary Information for “A comparative MD study of the local structure of polymer semiconductors P3HT and PBTTT”

Khanh Do, David M. Huang, Roland Faller, Adam J. Moulé  
*Department of Chemical Engineering & Materials Science,  
University of California, Davis, CA 95616, USA*

5

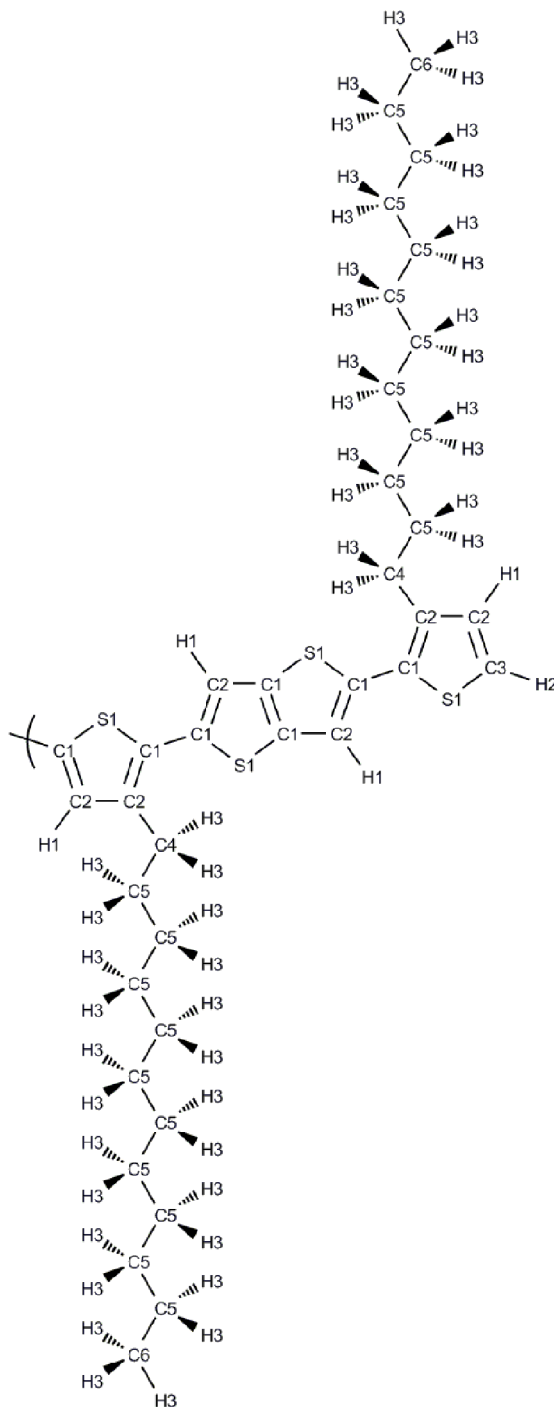

**Fig. S1** Chemical structure of the end monomer in a poly(2,5-bis(3-alkylthiophen-2-yl)thieno[3,2-b]thiophene) (PBTTT) chain. Atoms of different type on our atomistic model are labelled with different numerical suffixes.

**Table S1** Non-bonded parameters (LJ diameter  $\sigma_{ij}$ , LJ interaction strength  $\epsilon_{ij}$ , and charge  $q_i$ ) used in atomistic simulation models of PBTTT. PBTTT atom types are defined in Fig. S1.

| Atom type $i$   | $\sigma_{ij}/\text{\AA}$ | $\epsilon_{ij}/\text{kcal mol}^{-1}$ | $q_i/e$ |
|-----------------|--------------------------|--------------------------------------|---------|
| S1 <sup>a</sup> | 3.550                    | 0.250                                | -0.1496 |
| C1 <sup>a</sup> | 3.550                    | 0.070                                | 0.0748  |
| C2 <sup>a</sup> | 3.550                    | 0.070                                | -0.1817 |
| C3 <sup>a</sup> | 3.550                    | 0.070                                | -0.1412 |
| C4 <sup>b</sup> | 3.500                    | 0.066                                | 0.0617  |
| C5 <sup>c</sup> | 3.500                    | 0.066                                | -0.1200 |
| C6 <sup>c</sup> | 3.500                    | 0.066                                | -0.1800 |
| H1 <sup>a</sup> | 2.420                    | 0.030                                | 0.1817  |
| H2 <sup>a</sup> | 2.420                    | 0.030                                | 0.2160  |
| H3 <sup>c</sup> | 2.500                    | 0.030                                | 0.0600  |

<sup>a</sup> Adapted from Ref. [1] (see our previous work for details [3]), with LJ parameters from OPLS-AA model [2].

<sup>b</sup> From OPLS-AA model [2], with charge adjusted for monomer neutrality.

<sup>c</sup> From OPLS-AA model [2].

**Table S2** Parameters used in harmonic bond length potential  $V_{\text{bond}}(l) = k_b(l - l_0)^2/2$  in atomistic simulation models of PBTTT. PBTTT atom types are defined in Fig. S1.

| Bond type                | $l_0/\text{\AA}$ | $k_b/\text{kcal mol}^{-1} \text{\AA}^{-2}$ |
|--------------------------|------------------|--------------------------------------------|
| S1-C1 <sup>a</sup>       | 1.732            | 582.50                                     |
| C1-C2 <sup>a</sup>       | 1.364            | 1028.54                                    |
| C2-C2 <sup>a</sup>       | 1.428            | 906.20                                     |
| C2-H1 <sup>a</sup>       | 1.080            | 741.26                                     |
| C1-C1 <sup>a</sup>       | 1.430            | 784.58                                     |
| C3-H2 <sup>a</sup>       | 1.080            | 741.26                                     |
| C2-C4 <sup>b</sup>       | 1.510            | 634.00                                     |
| C4/C5-C5/C6 <sup>b</sup> | 1.529            | 536.00                                     |
| C4/C5/C6-H3 <sup>b</sup> | 1.090            | 680.00                                     |

<sup>a</sup> Adapted from Ref. [1] (see our previous work for details [3]).

<sup>b</sup> From Ref. [2].

15

**Table S3** Parameters used in harmonic bond angle potential  $V_{\text{angle}}(\theta) = k_\theta(\theta - \theta_0)^2/2$  in atomistic simulation models of PBTTT. PBTTT atom types are defined in Fig. S1.

| Angle type                        | $\theta_0/\text{deg.}$ | $k_\theta/\text{kcal mol}^{-1} \text{rad}^{-2}$ |
|-----------------------------------|------------------------|-------------------------------------------------|
| C1-S1-C1 <sup>a</sup>             | 92.774                 | 172.720                                         |
| S1-C1-C2 <sup>a</sup>             | 110.292                | 172.720                                         |
| C1-C2-C2 <sup>a</sup>             | 113.322                | 79.164                                          |
| C2-C2-H1 <sup>a</sup>             | 123.700                | 70.526                                          |
| C2-C1-C1 <sup>a</sup>             | 130.140                | 109.388                                         |
| C2-C3-H2 <sup>a</sup>             | 125.100                | 70.526                                          |
| C1-C2-H1 <sup>a</sup>             | 122.979                | 70.526                                          |
| S1-C1-C1 <sup>a</sup>             | 119.569                | 83.480                                          |
| S1-C3-H2 <sup>a</sup>             | 124.609                | 57.574                                          |
| C2-C2-C4 <sup>b</sup>             | 123.700                | 140.000                                         |
| C1-C2-C4 <sup>b</sup>             | 122.979                | 140.000                                         |
| C2-C4-C5 <sup>c</sup>             | 114.000                | 126.000                                         |
| C2-C4-H3 <sup>c</sup>             | 109.500                | 70.000                                          |
| C4/C5-C5-C5/C6 <sup>c</sup>       | 112.700                | 116.700                                         |
| C4/C5/C6-C4/C5/C6-H3 <sup>c</sup> | 110.700                | 75.000                                          |
| H3-C4/C5/C6-H3 <sup>c</sup>       | 107.800                | 66.000                                          |

<sup>a</sup> Adapted from Ref. [1] (see our previous work for details [3]).

<sup>b</sup>  $\theta_0$  adapted from Ref. [1];  $k_\theta$  from Ref. [2].

<sup>c</sup> From Ref. [2].

25

## References

- 1 V. Marcon and G. Raos, *J. Am. Chem. Soc.*, 2006, **128**, 1408-1409.
- 2 W. L. Jorgensen, D. S. Maxwell and J. Tirado-Rives, *J. Am. Chem. Soc.*, 1996, **118**, 11225-11236.
- 3 D. M. Huang, R. Faller, K. Do and A. J. Moulé, *Journal of Chemical Theory and Computation*, 2010, **6**, 526-537.
